# Supplementary material for: Charge and spin thermoelectric transport in benzene-based molecular nano-junctions: a quantum many-body study
Source: Royal Society of Chemistry journal article supplement (doi:10.1039/d3nr04714h), 2023-12-21
Supplement: d3nr04714h1.pdf [file d3nr04714h1.pdf]

Supporting Information for  
Charge and Spin Thermoelectric Transport in Benzene-Based  
Molecular Nano-Junctions: A Quantum Many-Body Study

Parbati Senapati<sup>1</sup> and Prakash Parida<sup>1,\*</sup>

<sup>1</sup>Department of Physics, Indian Institute of Technology Patna, Bihta, Bihar, 801106, India

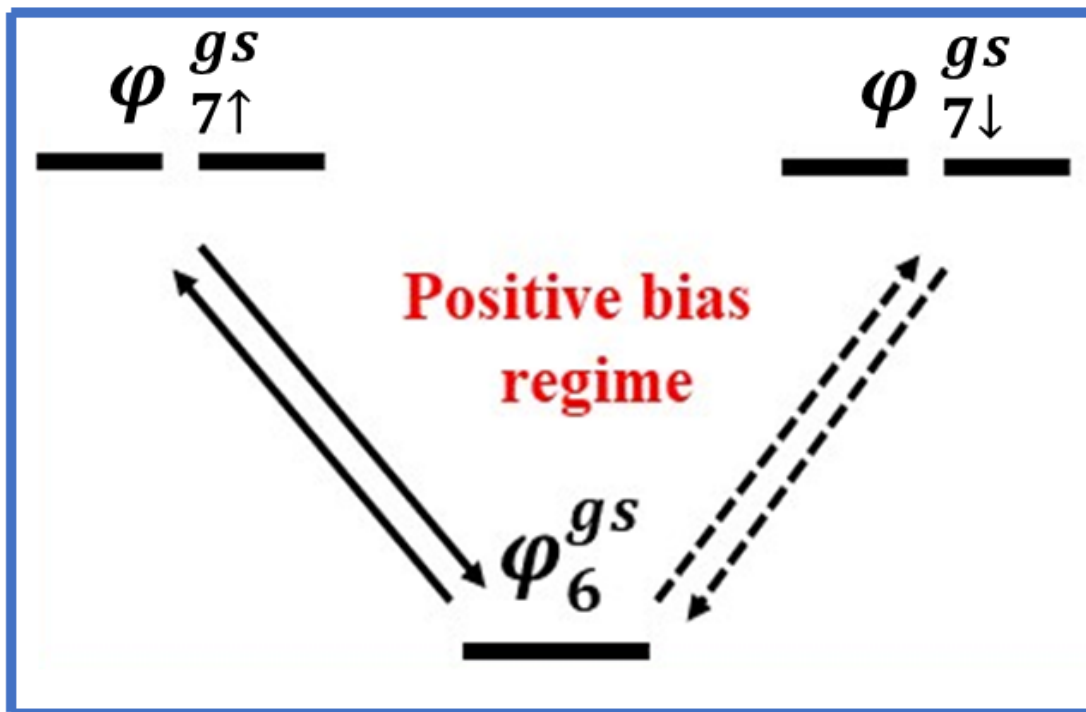

Figure S 1. Sketch of the energetics for the 6 → 7 transition in benzene (positive bias regime). The bold line represents the appropriate possible transitions for which current flow occurs, while the dotted line (only for ortho and meta-connections) represents the forbidden transitions that result in a current blocking situation yielding NDC at specific bias ranges. There is no current-blocking state in the para connection of benzene.

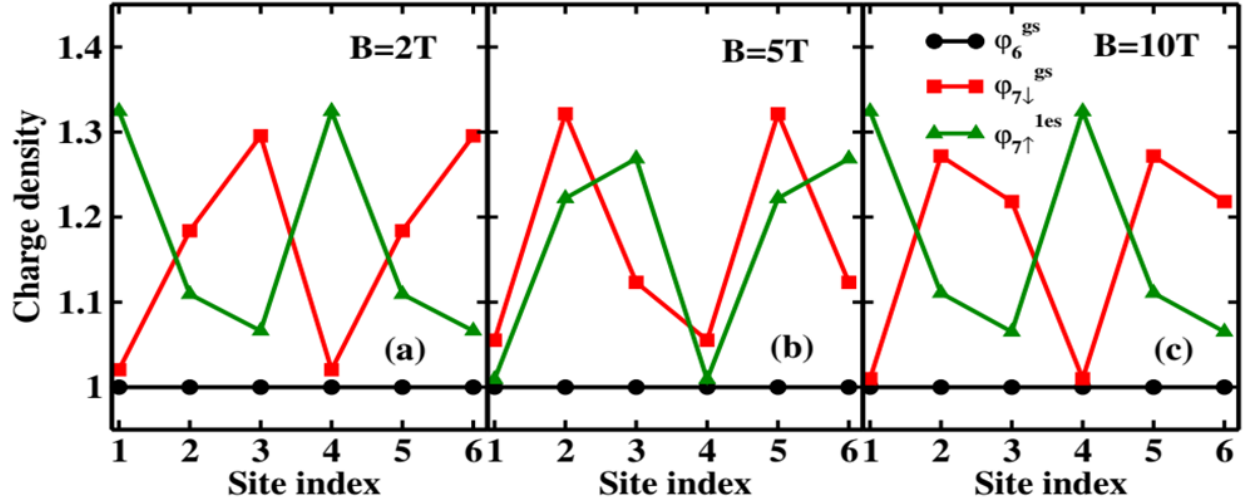

Figure S 2. The charge density distribution of 6-electron ground state ( $\phi_6^{gs}$ ), spin down and spin up of 7-electron ground state ( $\phi_{7\downarrow}^{gs}$ ) and first excited state ( $\phi_{7\uparrow}^{1es}$ ) over the sites of benzene at (a)  $B = 2T$ , (b)  $B = 5T$  and (c)  $B = 10T$  respectively.

Table S I. 6e-gs and 7e-gs energy level splitting in benzene molecule weakly coupled to normal electrode at different magnetic field (B). Note: in NE,  $\phi_{7\uparrow}^{1es}$  will be  $\phi_{7\uparrow}^{gs}$ .

| Electrode  | $\phi_6^{gs}$ | $\phi_{7\downarrow}^{gs}$ | $\phi_{7\uparrow}^{1es}$ |
|------------|---------------|---------------------------|--------------------------|
| NE         | -30.73        | -25.68                    | -25.68                   |
| NE (B=2T)  | -30.73        | -25.91                    | -25.45                   |
| NE (B=5T)  | -30.73        | -26.25                    | -25.10                   |
| NE (B=10T) | -30.73        | -26.83                    | -24.53                   |

\* pparida@iitp.ac.in

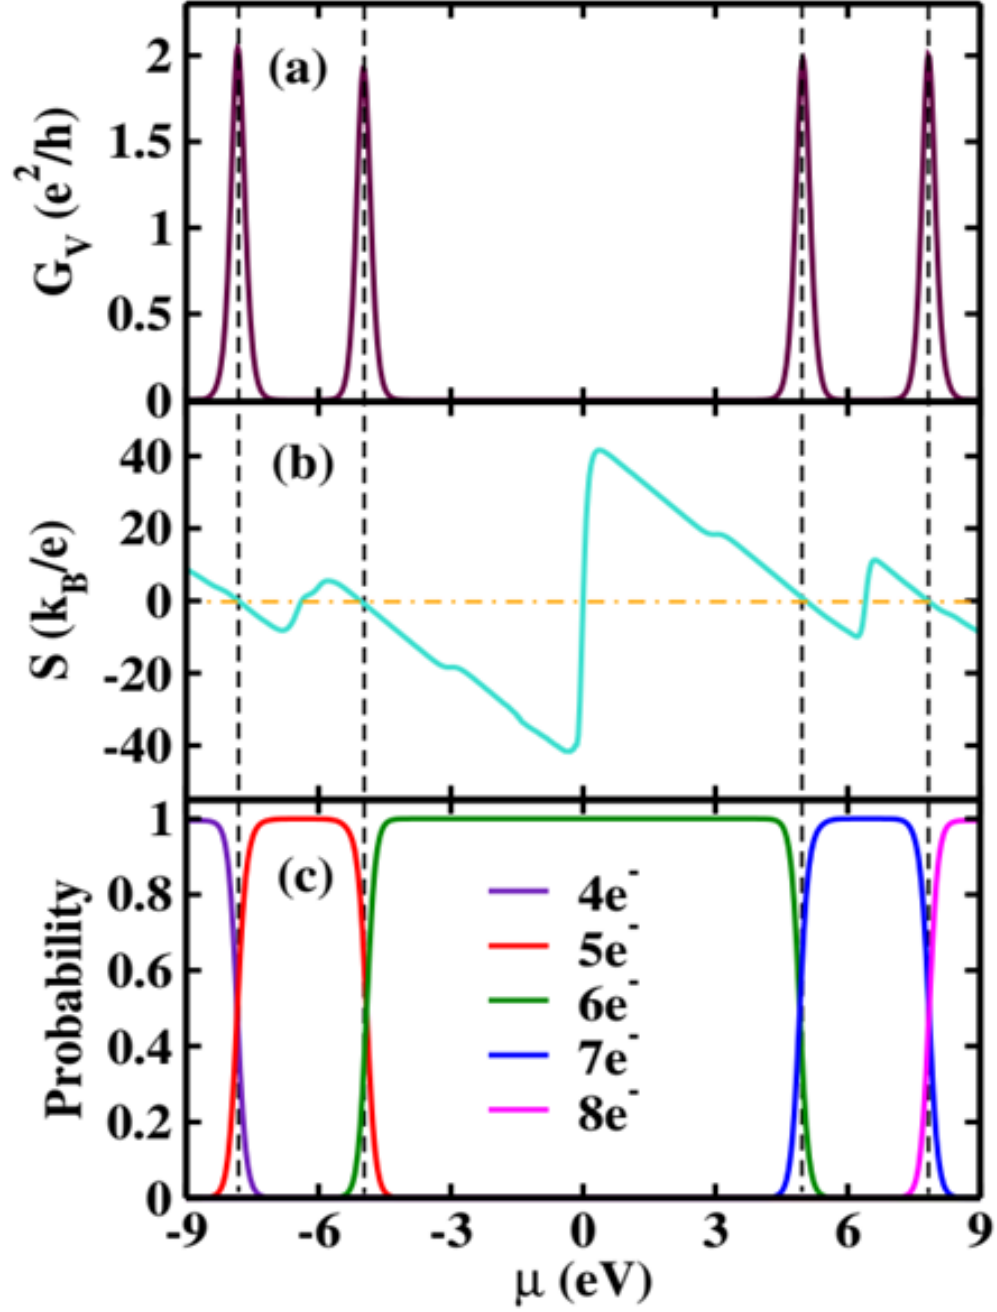

Figure S 3. (a) The electrical conductance, (b) Seebeck coefficient, and (c) the probabilities of occupying  $4e^-$ ,  $5e^-$ ,  $6e^-$ ,  $7e^-$  and  $8e^-$  states as a function of chemical potential ( $\mu$ ) at  $k_B T = 0.1eV$ .

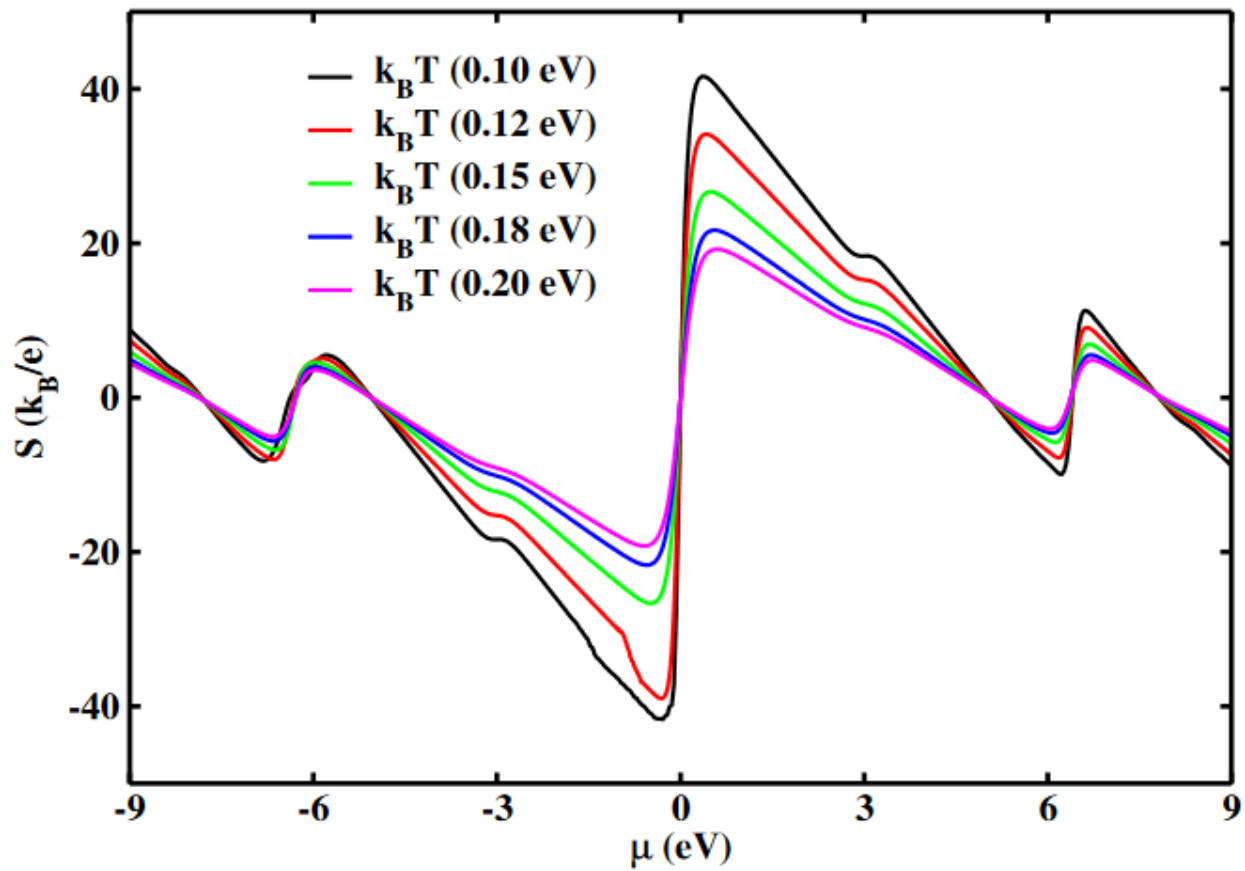

Figure S 4. The 2D plot of charge Seebeck coefficient as a function of different chemical potentials with varying five different temperatures showing saw-tooth pattern.

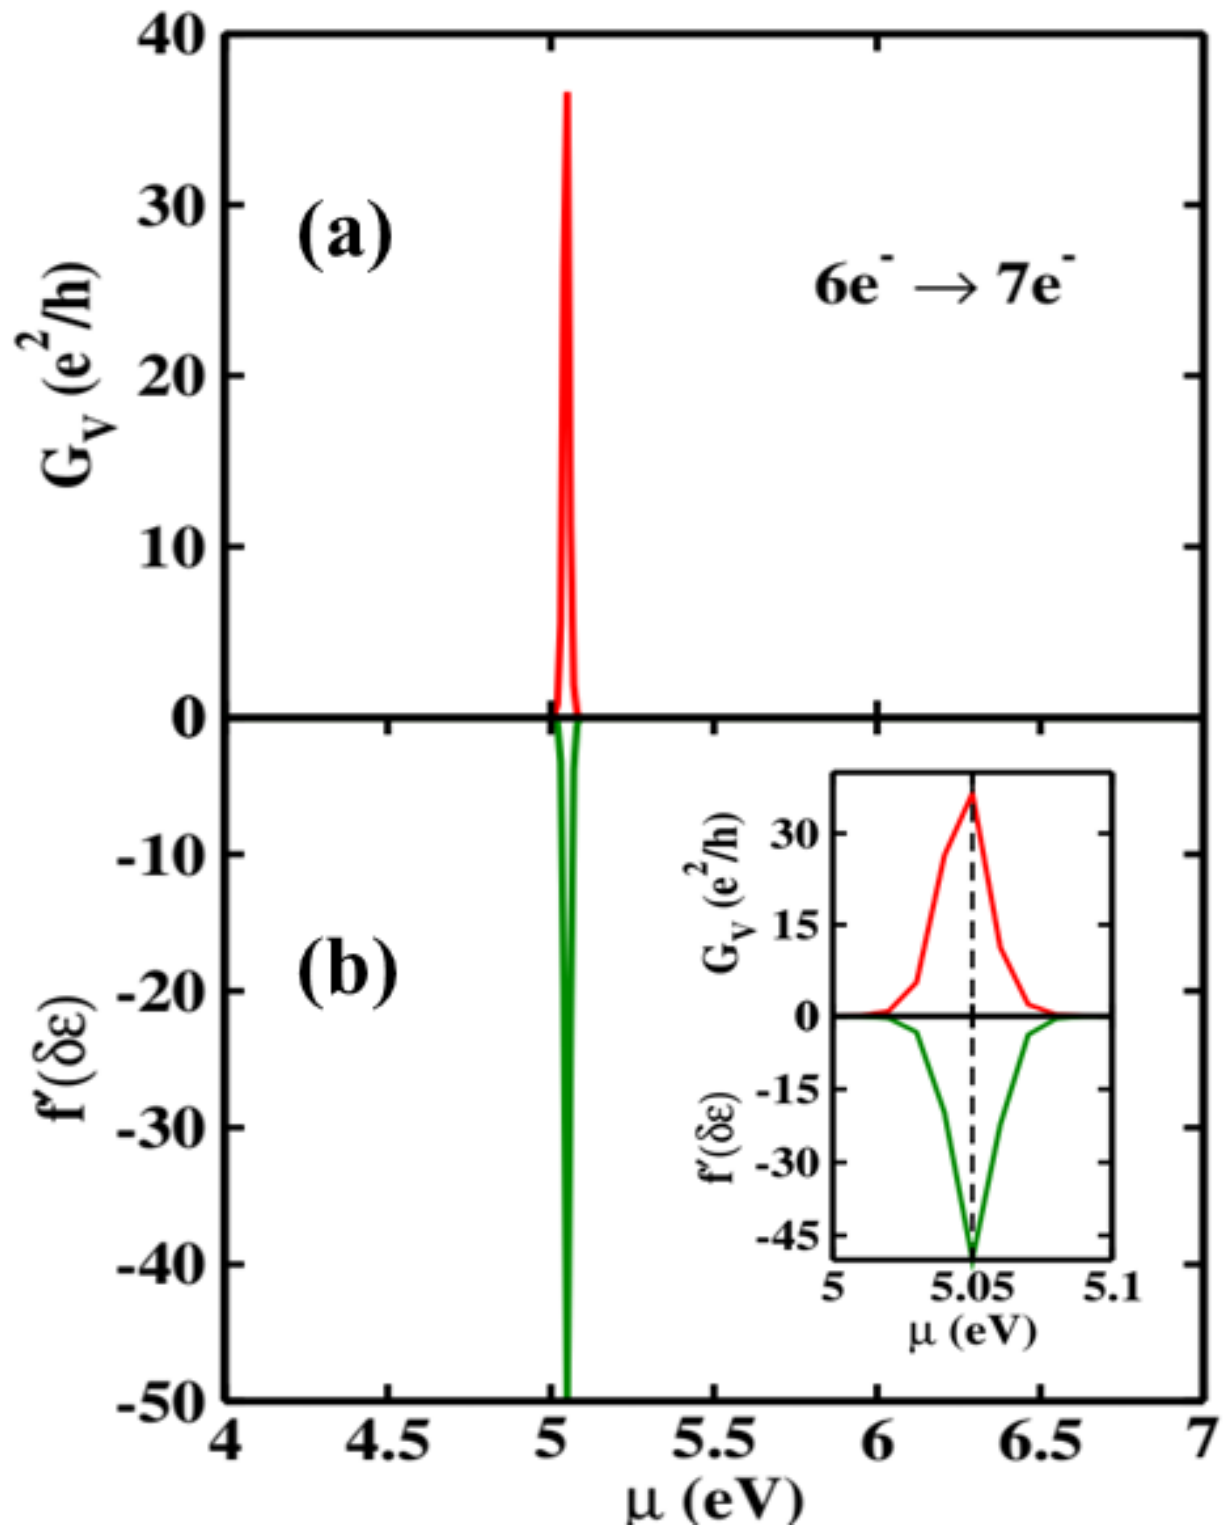

Figure S 5. (a) Represents the 2D plot of electrical conductance (b) derivative of Fermi-Dirac distribution ( $f'(\delta\varepsilon)$ , where  $\varepsilon$  is transition energy) as a function of  $\mu$  at  $T = 0.005k_B T$  (only taking the 6 $\rightarrow$ 7 transition). The inset of the figure provides a magnified view of a specific region.

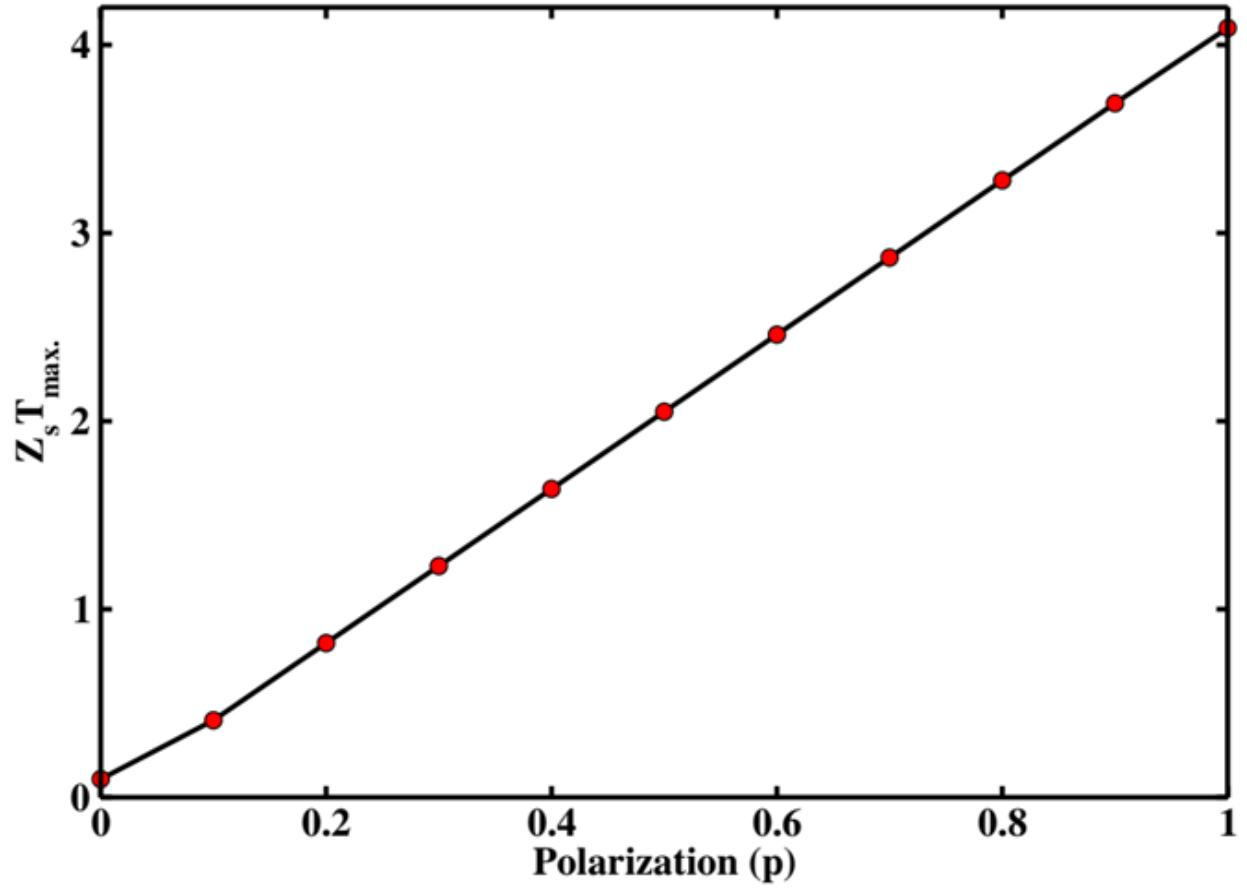

Figure S 6. The maximum value of  $Z_s T$  as a function of different polarization (p).

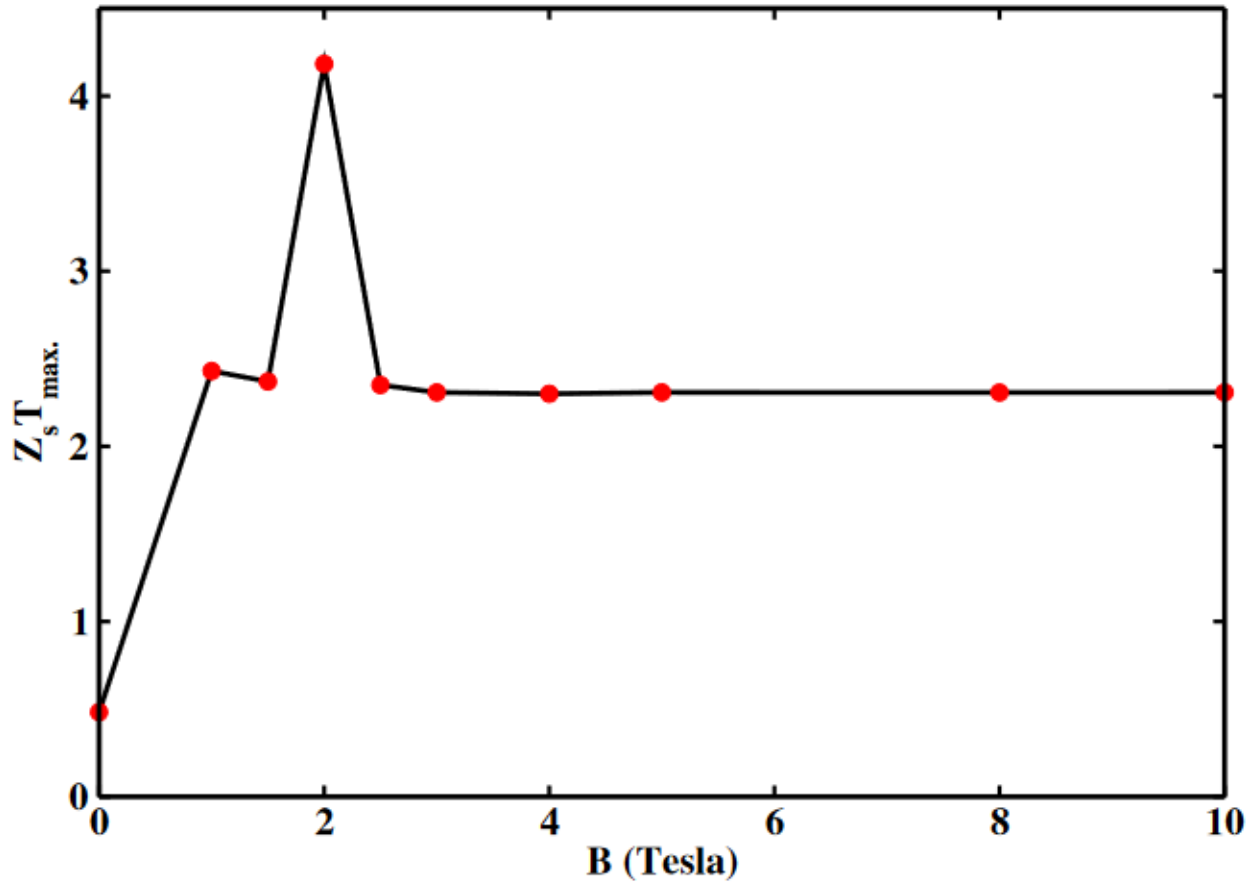

Figure S 7. The maximum value of  $Z_s T$  as a function of different magnetic field (B).
